# Supplementary material for: Probiotic Limosilactobacillus reuteri DSM 17938 Changes Foxp3 Deficiency-Induced Dyslipidemia and Chronic Hepatitis in Mice
Source: MDPI journal article supplement (doi:10.3390/nu16040511), 2024-02-12
Supplement: s1 [file s1]

**Supplementary Table S1. PCR Primers for genes associated with lipid metabolism.**

| Gene Name       | Forward primer          | Reverse primer        |
|-----------------|-------------------------|-----------------------|
| <i>Ppara</i>    | ACAAGGCCTCAGGGTACCA     | GCCGAAAGAAGCCCTTACAG  |
| <i>Acox1</i>    | GAGCCTTTGGACCTTCACCTTGG | CGCATAAGTGCCCGTGATCT  |
| <i>Cpt1a</i>    | GGACTCCGCTCGCTCATTC     | GAGATCGATGCCATCAGGGG  |
| <i>Cpt2</i>     | TGTGAGCGGAAGATCCCAAC    | GCTTTCCAACCCGATCTCCT  |
| <i>Ppargc1a</i> | CTCTCAGTAAGGGGCTGGTTG   | TTGGCTGCACATGTCCCAAG  |
| <i>Acot1</i>    | GGAGGTTGGGGAAAGGTACAAA  | AAACTCCATTCCCAGCCCTT  |
| <i>Acot3</i>    | TGAGCAGTTGCCCTTGCTTTT   | ATGGGCAGGGAGTTGGTGTT  |
| <i>Srebf1</i>   | GGGCAAGTACACAGGAGGAC    | AGATCTCTGCCAGTGTTGCC  |
| <i>Fasn</i>     | AAGCAGGCACACACAATGGA    | AGTGTTTCGTTCTCGGAGTG  |
| <i>Vldlr</i>    | CATGAACTCGTCCAGCCGTC    | GCTGGCAGGCAGAGATATTCA |
| <i>Cd36</i>     | GCCAAGCTATTGCGACATGAT   | CAGATCCGAACACAGCGTAGA |
| <i>Slc27a2</i>  | ATCGTGGTTGGGGCTACTTTAG  | TTGGTTTCTGCGGTGTGTTG  |
| <i>Slc27a5</i>  | GAGGGCAATGTGGGCTTAATG   | AGGCTCTGCTGTCTCTATGTC |

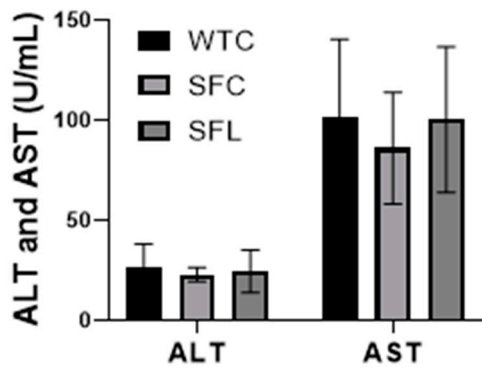

**Supplementary Figure S1. Normal plasma ALT and AST levels in SF mice.**
